# Supplementary material for: Conservation and global distribution of non-canonical antigens in Enterotoxigenic Escherichia coli
Source: PubMed Central journal article supplement (PMC6897418; doi:10.1371/journal.pntd.0007825), 2019-11-22
Supplement: pntd.0007825.s002.pdf [file pntd.0007825.s002.pdf]

**S1 Table. Primers used in this publication**

| Gene                            | Product size (bp) | Sequence (5'>3')                                   | Fleckenstein Lab ID |
|---------------------------------|-------------------|----------------------------------------------------|---------------------|
| eatA (GenBank: AY163491.2)      | 1943              | ATGTGCTTTGGCAGGTTAA                                | jf082213.1-F        |
|                                 |                   | ATATCCAGTCAGCACCCACT                               | jf082213.2-R        |
| etpA (GenBank: AY920525.2)      | 999               | GGTTCAGGCAGTATCCAGAC                               | jf082213.3-F        |
|                                 |                   | GGTGTAGCTGTCTGACCACA                               | jf082213.4-R        |
| eltB (GenBank: CBJ04425.1)      | 273               | ACGGCGTTACTATCCTCTC                                | jf092313.3-F        |
|                                 |                   | TGGTCTCGGTCAGATATGTG                               | jf092313.4-R        |
| sta1 (STp, GenBank: CBJ04435.1) | 166               | TCTTTCCCCTCTTTTAGTCAG                              | jf092313.5-F        |
|                                 |                   | ACAGGCAGGATTACAACAAAG                              | jf092313.6-R        |
| sta2 (STh, GenBank: CBJ04483.1) | 64                | TACAAGCAGGATTACAACAC                               | jf092313.7-F        |
|                                 |                   | AGTGGTCCTGAAAGCATG                                 | jf092313.8-R        |
| etpBA (GenBank: AY920525.2)     | 6521              | AATAATCTCGAGaATGGTGGTGAAATTCATG                    | jf031505.1-F        |
|                                 |                   | AATAATAAGCTTTTGCCAGTACACCTCACT                     | jf110705.2-R        |
| eatA (GenBank: AY163491.2)      | 4136              | GGCTAACAGGAGGAATTAACCATGAATA<br>AAGTGTTCTC TCTTAAG | jf053018.1-F        |
|                                 |                   | TATGGTACCAGCTGCAGATCTCAGAAAT<br>AATAACGGAAGTTAG    | jf053018.2-R        |
