# Supplementary material for: Conservation and global distribution of non-canonical antigens in Enterotoxigenic Escherichia coli
Source: PubMed Central journal article supplement (PMC6897418; doi:10.1371/journal.pntd.0007825), 2019-11-22
Supplement: pntd.0007825.s005.pdf [file pntd.0007825.s005.pdf]

1 **S4 Table. Bacterial strains and plasmids in this publication**

| Strain or plasmid      | Description                                                                                                                     | Reference           |
|------------------------|---------------------------------------------------------------------------------------------------------------------------------|---------------------|
| Strain                 |                                                                                                                                 |                     |
| 5-alpha                |                                                                                                                                 | New England Biolabs |
| Top10                  | <i>F<sup>-</sup> mcrA Δ(mrr-hsdRMS-mcrBC) Φ80lacZΔM15 ΔlacX74 recA1 araD139 Δ(ara leu)7697 galU galK rpsL (Str<sup>r</sup>)</i> | Invitrogen          |
| jf1477                 | Top10 (pJL030, pJL017)                                                                                                          | (1)                 |
| jf4927                 | Top10 cells (pJL030, pBad-myc-HisA_3954)                                                                                        | This study          |
| jf4894                 | Top10 cells (pJL030, pBad-myc-HisA_3645)                                                                                        | This study          |
| jf2827                 | LMG194ΔfliC                                                                                                                     | (2)                 |
| jf5003                 | LMG194ΔfliC (pBAD-myc-HisA-3813EatA)                                                                                            | This study          |
| Plasmids               |                                                                                                                                 |                     |
| pBAD-myc-HisA          | Arabinose inducible expression system                                                                                           | Invitrogen          |
| pJL030                 | <i>etpC</i> gene cloned into pACYC184; Cm <sup>r</sup>                                                                          | (3)                 |
| pJL017                 | <i>etpBA</i> gene cloned into pBAD-myc-HisA; Amp <sup>r</sup>                                                                   | (3)                 |
| pCR-Blunt II-TOPO      | <i>ccdB</i> Kan <sup>r</sup> Phleo <sup>r</sup> cloning vector                                                                  | Thermo Fisher       |
| pBAD-myc-HisA_3954     | <i>etpBA</i> gene from 500662 cloned into pBAD-myc-HisA; Amp <sup>r</sup>                                                       | This study          |
| pBAD-myc-HisA_3645     | <i>etpBA</i> gene from 201600538.1 cloned into pBAD-myc-HisA; Amp <sup>r</sup>                                                  | This study          |
| pBAD-myc-HisA-3813EatA | <i>eatA</i> gene from 700241 cloned into pBAD-myc-HisA; Amp <sup>r</sup>                                                        | This study          |

3 **Table References:**

- 4 1. Roy K, Hilliard GM, Hamilton DJ, Luo J, Ostmann MM, Fleckenstein JM. Enterotoxigenic  
5 *Escherichia coli* EtpA mediates adhesion between flagella and host cells. *Nature*.  
6 2009;457(7229):594-8.
- 7 2. Roy K, Kansal R, Bartels SR, Hamilton DJ, Shaaban S, Fleckenstein JM. Adhesin  
8 degradation accelerates delivery of heat-labile toxin by enterotoxigenic *Escherichia coli*. *J Biol*  
9 *Chem*. 2011;286(34):29771-9.
- 10 3. Fleckenstein JM, Roy K. Purification of recombinant high molecular weight two-partner  
11 secretion proteins from *Escherichia coli*. *Nat Protoc*. 2009;4(7):1083-92.
