# Supplementary material for: Conservation and global distribution of non-canonical antigens in Enterotoxigenic Escherichia coli
Source: PubMed Central journal article supplement (PMC6897418; doi:10.1371/journal.pntd.0007825), 2019-11-22
Supplement: pntd.0007825.s006.pdf [file pntd.0007825.s006.pdf]

1 **S5 Table. Results of Antigen prevalence by study origin**

| Study or Collection                   | Total<br>Isolates <sup>a</sup> | <i>eatA</i> or <i>EatA</i> |      |           | <i>etpA</i> or <i>EtpA</i> |      |           | Either <i>eatA</i> / <i>EatA</i> or<br><i>etpA</i> / <i>EtpA</i> |      |           |
|---------------------------------------|--------------------------------|----------------------------|------|-----------|----------------------------|------|-----------|------------------------------------------------------------------|------|-----------|
|                                       |                                | N <sup>b</sup>             | %    | 95%CI     | N                          | %    | 95%CI     | N                                                                | %    | 95%CI     |
| GEMS (1)                              | 807                            | 463                        | 57.4 | 54.0-60.8 | 414                        | 51.3 | 47.9-54.8 | 591                                                              | 73.2 | 70.2-76.3 |
| Minnesota Department of Health<br>(2) | 38                             | 18                         | 47.4 | 30.7-64.0 | 17                         | 44.7 | 28.2-61.3 | 23                                                               | 60.5 | 44.2-76.8 |
| Bangladesh <sup>c</sup>               | 50                             | 31                         | 62.0 | 48.1-75.9 | 20                         | 40.0 | 26.0-54.1 | 40                                                               | 80.0 | 68.5-91.5 |
| Chile (3) <sup>d</sup>                | 40                             | 20                         | 50.0 | 33.8-66.2 | 25                         | 62.5 | 46.8-78.2 | 31                                                               | 77.5 | 64.0-91.0 |
| Mexico Travelers (4)                  | 8                              | 2                          | 25.0 | 0-63.7    | 2                          | 25.0 | 0-63.7    | 2                                                                | 25.0 | 0-63.7    |
| Fleckenstein Lab (5) <sup>d</sup>     | 180                            | 105                        | 58.3 | 51.1-65.6 | 101                        | 56.1 | 48.8-63.4 | 138                                                              | 76.7 | 70.4-82.9 |
| Colombia (6) <sup>d,e</sup>           | 34                             | 20                         | 58.8 | 41.4-76.3 | 16                         | 47.1 | 29.4-64.7 | 22                                                               | 64.7 | 47.8-81.6 |

2 <sup>a</sup>Two isolates in this database came from outside sources not associated with any study and not included in this table (see S2 Table,

3 ThroopD (7), and TW10598 (8))

4 <sup>b</sup>Number of positive isolates5 <sup>c</sup>Samples obtained from routine culture surveillance6 <sup>d</sup>Antigen prevalence in these isolates was previously reported7 <sup>e</sup>Immunoblotting of these isolates was added in this report

8

9 **Table References:**

- 10 1. Kotloff KL, Nataro JP, Blackwelder WC, Nasrin D, Farag TH, Panchalingam S, et al. Burden and aetiology of diarrhoeal  
11 disease in infants and young children in developing countries (the Global Enteric Multicenter Study, GEMS): a prospective, case-  
12 control study. *Lancet*. 2013;382(9888):209-22.
- 13 2. Medus C, Besser JM, Juni BA, Koziol B, Lappi V, Smith KE, et al. Long-Term Sentinel Surveillance for Enterotoxigenic  
14 *Escherichia coli* and Non-O157 Shiga Toxin-Producing *E. coli* in Minnesota. *Open Forum Infect Dis*. 2016;3(1):ofw003.
- 15 3. Montero D, Vidal M, Pardo M, Torres A, Kruger E, Farfan M, et al. Characterization of enterotoxigenic *Escherichia coli* strains  
16 isolated from the massive multi-pathogen gastroenteritis outbreak in the Antofagasta region following the Chilean earthquake, 2010.  
17 *Infect Genet Evol*. 2017;52:26-9.
- 18 4. Mohamed JA, DuPont HL, Flores J, Palur H, Nair P, Jiang ZD, et al. Single nucleotide polymorphisms in the promoter of the  
19 gene encoding the lipopolysaccharide receptor CD14 are associated with bacterial diarrhea in US and Canadian travelers to Mexico.  
20 *Clin Infect Dis*. 2011;52(11):1332-41.
- 21 5. Luo Q, Qadri F, Kansal R, Rasko DA, Sheikh A, Fleckenstein JM. Conservation and immunogenicity of novel antigens in  
22 diverse isolates of enterotoxigenic *Escherichia coli*. *PLoS Negl Trop Dis*. 2015;9(1):e0003446.
- 23 6. Gomez-Duarte OG, Romero-Herazo YC, Paez-Canro CZ, Eslava-Schmalbach JH, Arzuza O. Enterotoxigenic *Escherichia coli*  
24 associated with childhood diarrhoea in Colombia, South America. *J Infect Dev Ctries*. 2013;7(5):372-81.
- 25 7. Finkelstein RA, Vasil ML, Jones JR, Anderson RA, Barnard T. Clinical cholera caused by enterotoxigenic *Escherichia coli*. *J*  
26 *Clin Microbiol*. 1976;3(3):382-4.
- 27 8. Steinsland H, Valentiner-Branth P, Perch M, Dias F, Fischer TK, Aaby P, et al. Enterotoxigenic *Escherichia coli* infections and  
28 diarrhea in a cohort of young children in Guinea-Bissau. *J Infect Dis*. 2002;186(12):1740-7.

29
