# Supplementary material for: Conservation and global distribution of non-canonical antigens in Enterotoxigenic Escherichia coli
Source: PubMed Central journal article supplement (PMC6897418; doi:10.1371/journal.pntd.0007825), 2019-11-22

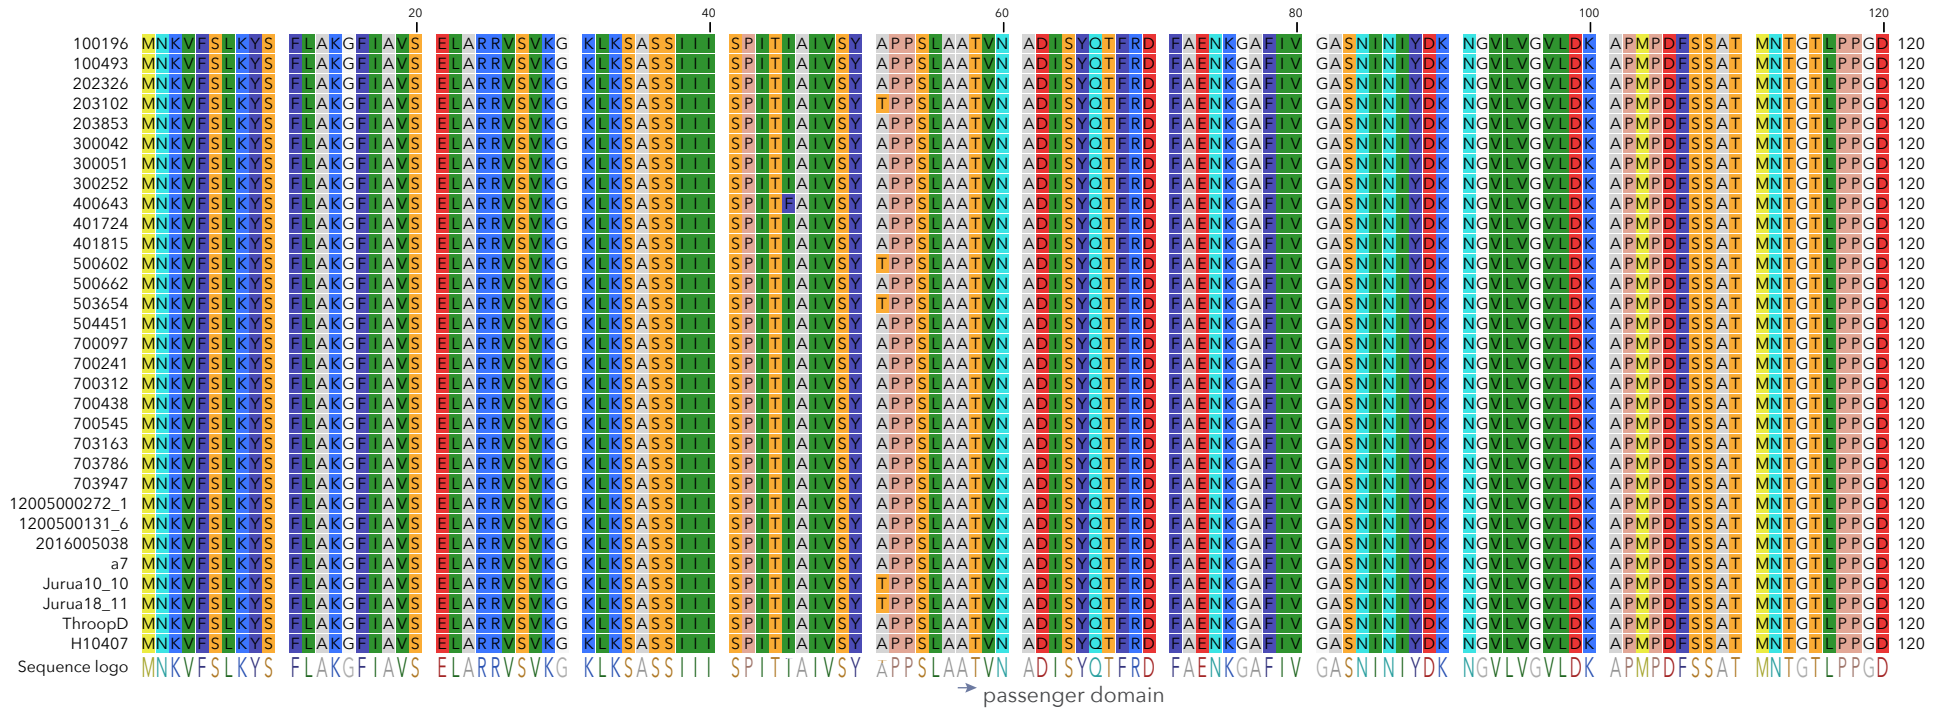









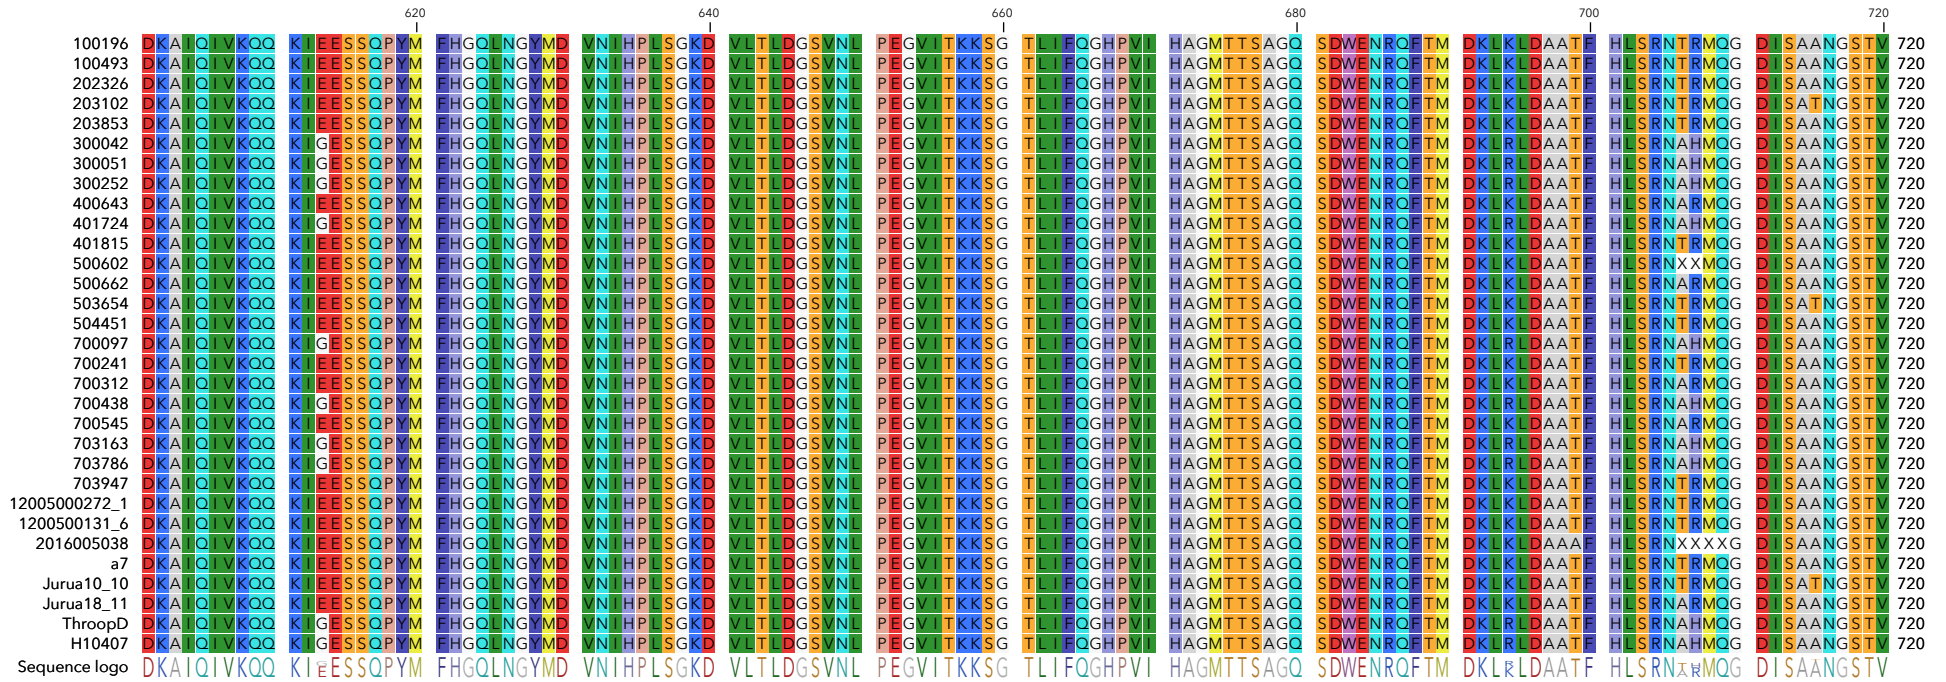



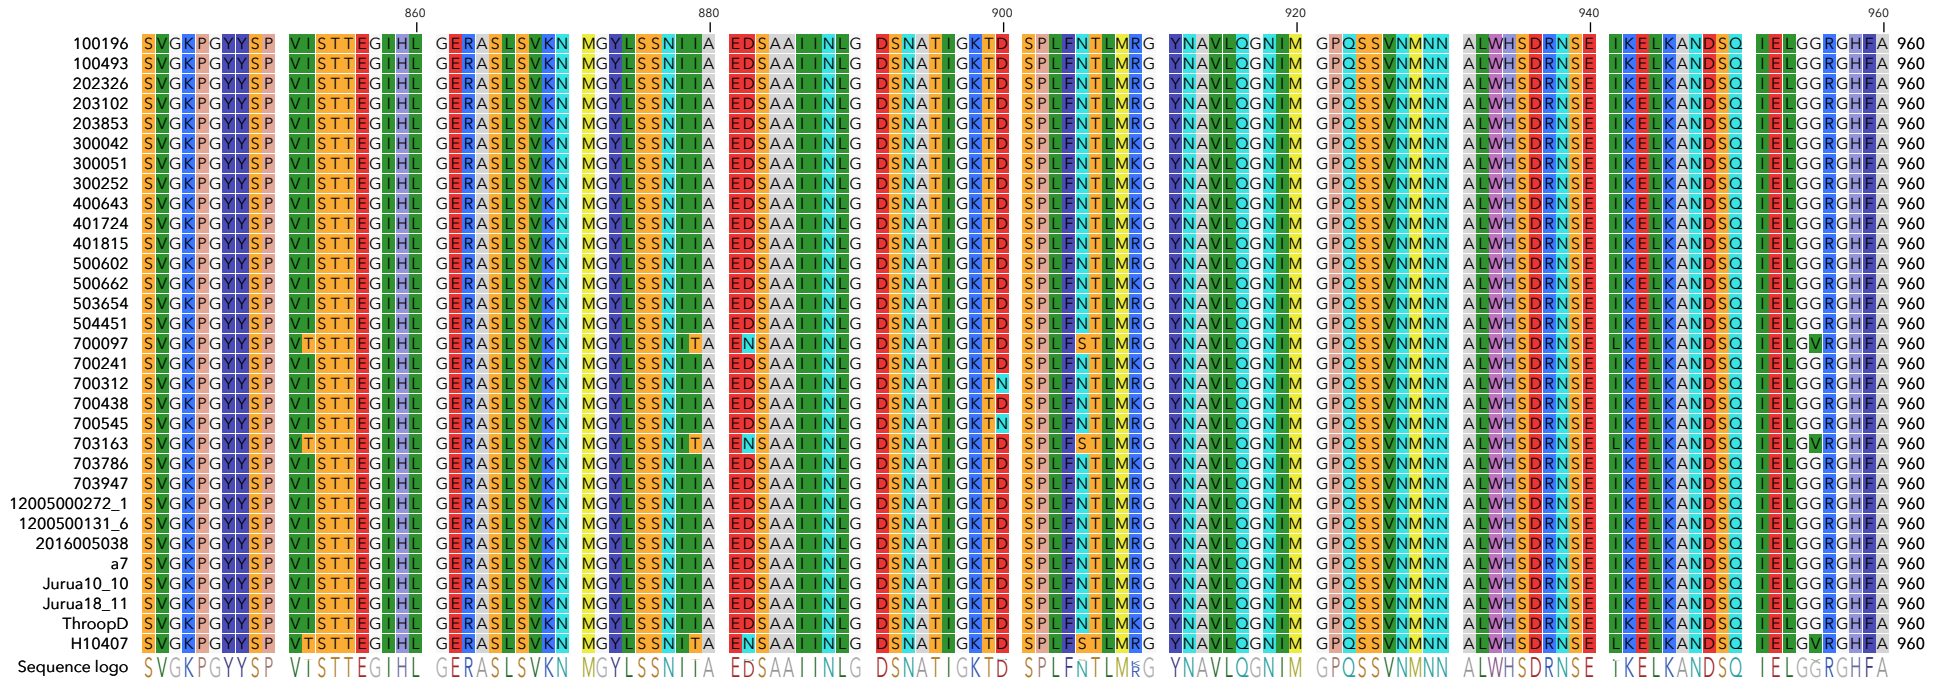



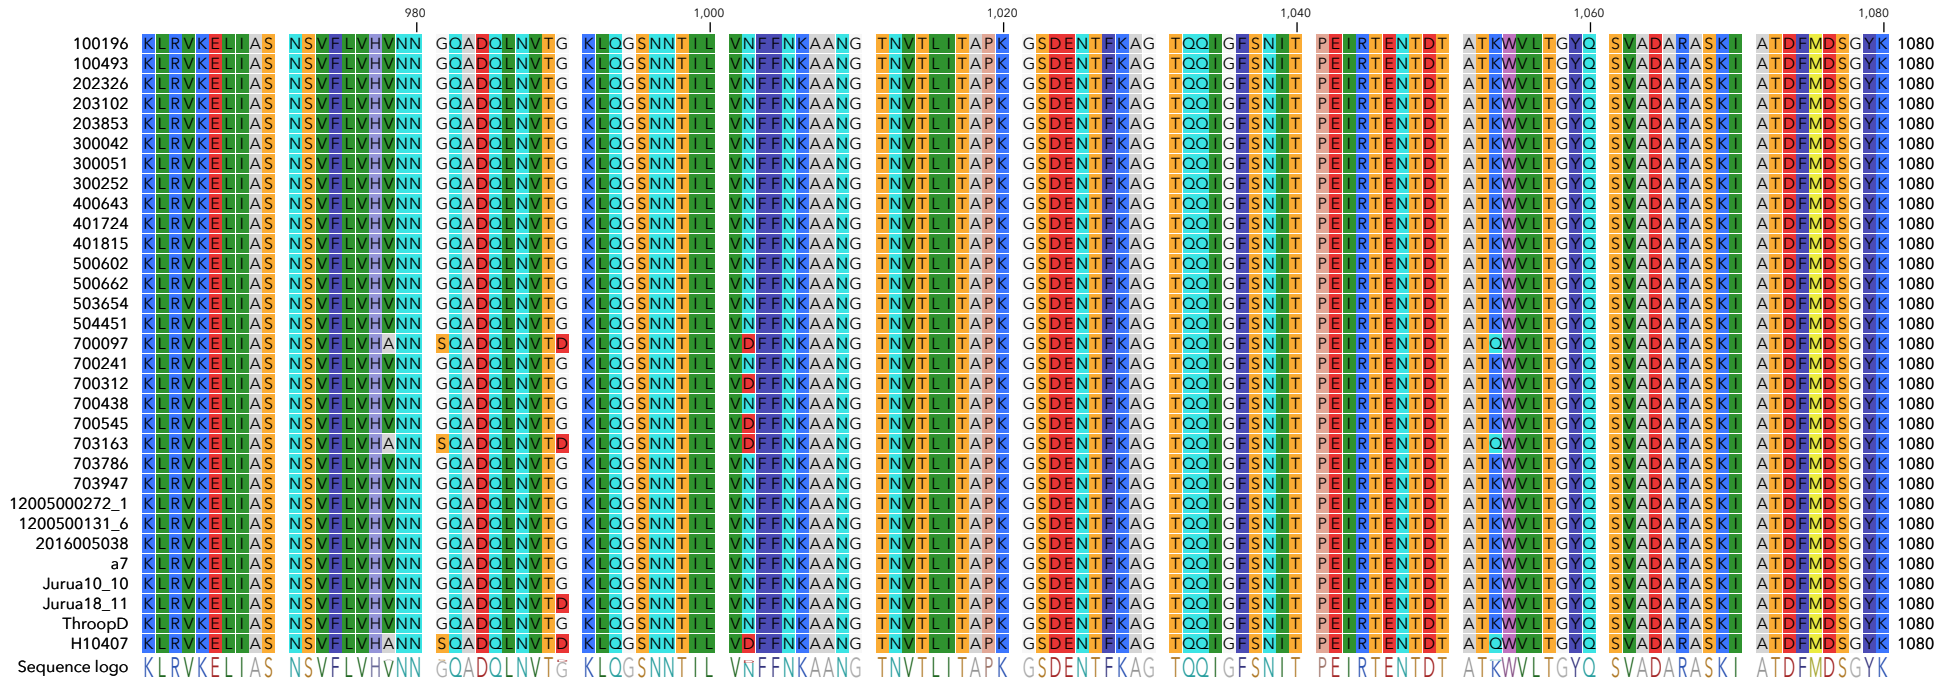

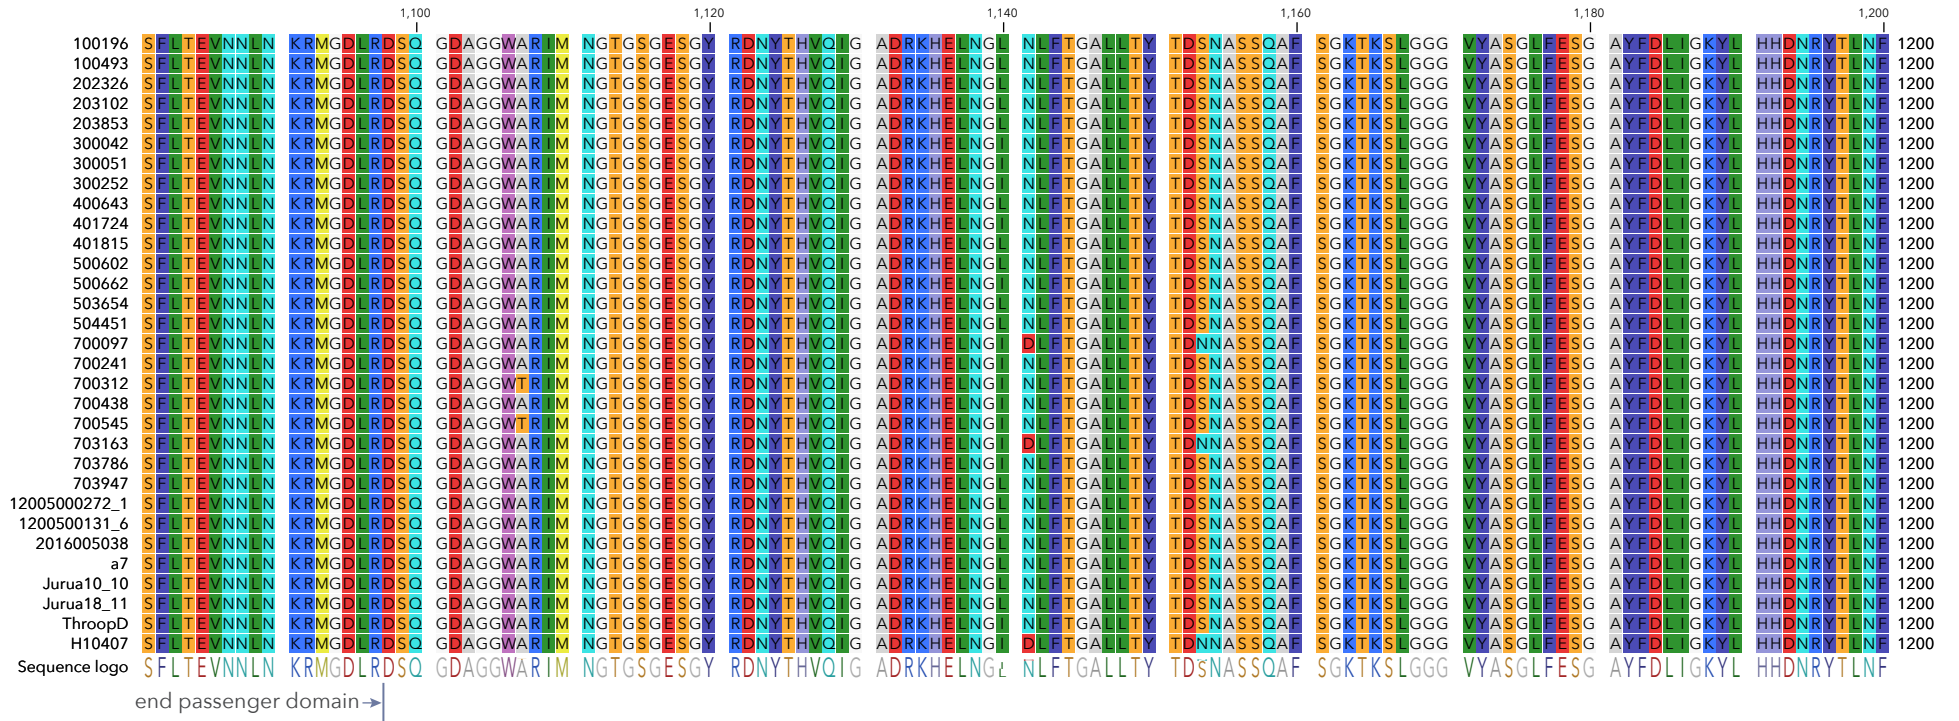



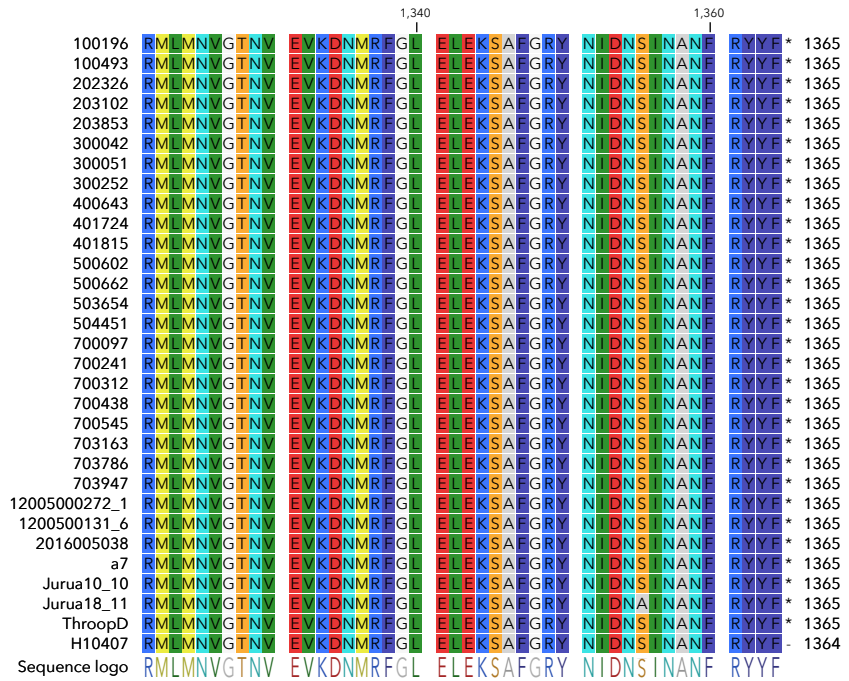

Supplement: pntd.0007825.s009.pdf [file pntd.0007825.s009.pdf]
